# Supplementary material for: Genome-Wide Analysis of WRKY Genes and Their Response to Hormone and Mechanic Stresses in Carrot
Source: Front Genet. 2019 May 1;10:363. doi: 10.3389/fgene.2019.00363 (PMC6504813; doi:10.3389/fgene.2019.00363)
Supplement: Supplementary file 3 [file Table_3.xls]

## Sheet: Sheet1
Table S3 Cis-acting elements analysis of DcsWRKY genes identified in this study
Gene ID	Gene Name	Motifs related to plant growth and development										motifs related to stress response
		box4	G-box	sp1	Skn-1_motif	circadian	CCGTCC-box	CAT-box	GCN4_motif	ACE	CGTCA-motif	TGACG-motif	ABRE	TCA-element	TGA-element	ARE	Box-W1	GARE-motif	TC-rich repeats	MBS	HSE	LTR	WUN-motif	TATC-box	p-box	ERE
		light responsive	light responsive	light responsive	endosperm expression	circadian control	meristem specific activation	meristem expression	endosperm expression	light responsive	MeJA response	MeJA response	ABA response	heat stress/SA responsive	auxin-responsive	anaerobic induction	fungal elicitor responsive	gibberellin-responsive	Defense and stress	Drought stress	Heat stress	low-temperature stress	wound-responsive element	gibberellin-responsive	gibberellin-responsive	ethylene-responsive element
DCAR_000635	DcsWRKY1		√	√	√	√			√											√	√
DCAR_001382	DcsWRKY3	√		√								√											√
DCAR_024663	DcsWRKY56	√	√						√				√	√			√	√						√
DCAR_023971	DcsWRKY55	√	√		√	√					√			√					√		√	√
DCAR_028753	DcsWRKY63	√	√	√	√			√	√		√			√	√	√			√
DCAR_027985	DcsWRKY62		√	√					√		√						√			√	√	√
DCAR_028893	DcsWRKY64	√	√				√				√					√			√	√			√
DCAR_005640	DcsWRKY11	√		√					√					√		√					√
DCAR_007815	DcsWRKY18	√	√		√	√		√					√				√		√
DCAR_005574	DcsWRKY10	√	√	√	√	√						√				√
DCAR_007136	DcsWRKY15	√	√	√					√					√			√									√
DCAR_006949	DcsWRKY14	√									√						√			√
DCAR_005143	DcsWRKY8		√			√	√									√
DCAR_009610	DcsWRKY23	√	√			√	√			√	√	√			√		√	√	√						√
DCAR_010862	DcsWRKY26	√			√									√		√			√		√
DCAR_012521	DcsWRKY28			√	√	√			√		√					√
DCAR_010624	DcsWRKY24	√	√							√	√	√	√	√					√				√			√
DCAR_030029	DcsWRKY65	√	√	√		√				√		√	√				√		√
DCAR_017993	DcsWRKY38		√	√	√					√				√		√	√		√	√
DCAR_019422	DcsWRKY44	√	√					√				√						√		√	√		√
DCAR_016536	DcsWRKY36	√		√	√			√		√		√				√							√
DCAR_019232	DcsWRKY41	√	√	√								√				√			√
DCAR_016302	DcsWRKY35	√			√	√								√	√					√		√
DCAR_019421	DcsWRKY43	√	√					√				√						√		√	√		√
DCAR_019267	DcsWRKY42	√	√	√		√			√			√			√	√						√
DCAR_012791	DcsWRKY29	√	√		√	√					√						√	√			√					√
DCAR_014683	DcsWRKY33	√	√					√					√		√		√	√	√
DCAR_019969	DcsWRKY46	√			√	√		√	√		√	√	√								√
DCAR_020153	DcsWRKY48	√			√	√						√						√		√	√
DCAR_022855	DcsWRKY53	√			√	√			√												√
DCAR_021802	DcsWRKY51	√								√				√		√	√			√	√
DCAR_000809	DcsWRKY2	√			√	√	√		√					√		√				√		√		√
DCAR_004610	DcsWRKY5	√	√	√	√	√				√		√	√						√	√	√		√
DCAR_004233	DcsWRKY4	√	√	√	√	√				√	√	√	√	√		√
DCAR_023855	DcsWRKY54					√		√								√		√		√
DCAR_025398	DcsWRKY57				√									√					√	√	√
DCAR_025562	DcsWRKY58	√	√	√							√	√	√		√		√								√	√
DCAR_026069	DcsWRKY59	√			√	√					√						√			√
DCAR_026990	DcsWRKY60		√		√				√			√	√			√	√	√		√	√	√
DCAR_027713	DcsWRKY61	√	√		√	√							√								√					√
DCAR_005872	DcsWRKY13	√				√		√	√																	√
DCAR_005753	DcsWRKY12	√		√	√			√	√							√		√		√
DCAR_007343	DcsWRKY17	√					√									√	√	√	√
DCAR_005083	DcsWRKY7		√		√	√							√						√		√
DCAR_008173	DcsWRKY19	√					√				√			√		√			√
DCAR_005034	DcsWRKY6	√		√	√						√									√	√					√
DCAR_008638	DcsWRKY21	√			√						√	√	√			√	√		√	√						√
DCAR_008655	DcsWRKY22	√	√	√	√						√	√			√				√	√						√
DCAR_007177	DcsWRKY16	√	√	√	√	√			√					√		√	√			√		√
DCAR_008352	DcsWRKY20	√	√														√			√						√
DCAR_005379	DcsWRKY9	√		√															√		√				√	√
DCAR_010654	DcsWRKY25		√	√		√			√	√	√					√				√
DCAR_012337	DcsWRKY27	√	√		√	√	√						√	√	√				√	√
DCAR_031047	DcsWRKY67	√	√	√	√	√							√	√						√						√
DCAR_030459	DcsWRKY66	√	√	√	√								√				√			√						√
DCAR_018294	DcsWRKY40	√			√														√	√		√
DCAR_019758	DcsWRKY45	√			√	√								√				√	√	√	√	√
DCAR_016808	DcsWRKY37	√	√						√		√														√
DCAR_018041	DcsWRKY39	√		√	√					√	√	√		√				√	√	√	√	√
DCAR_014497	DcsWRKY32	√	√								√		√	√					√	√	√					√
DCAR_012904	DcsWRKY30				√	√	√		√			√		√		√	√			√	√
DCAR_014957	DcsWRKY34	√	√		√					√			√				√		√		√					√
DCAR_013280	DcsWRKY31	√	√	√	√		√				√	√	√			√			√		√					√
DCAR_021820	DcsWRKY52	√			√				√		√	√	√	√					√	√		√
DCAR_020141	DcsWRKY47	√	√			√					√	√	√							√	√				√
DCAR_021299	DcsWRKY50		√	√	√	√			√	√	√							√							√
DCAR_021163	DcsWRKY49			√						√				√					√
